# Supplementary material
Source: PubMed Central journal article supplement (PMC2652373)
Supplement: blood-2008-08-174953_1.pdf [file blood-2008-08-174953_1.pdf]

| <b>Characteristic</b>  | <b>Number of cases</b> |
|------------------------|------------------------|
| <b>All patients</b>    | 169                    |
| <b>Gender</b>          |                        |
| Male                   | 88                     |
| Female                 | 79                     |
| N/A                    | 2                      |
| <b>Age</b>             |                        |
| Mean (SD)              | 52 (14.5)              |
| 60 and under           | 114                    |
| Over 60 years          | 54                     |
| N/A                    | 1                      |
| <b>Tumour grade</b>    |                        |
| I                      | 69                     |
| II                     | 56                     |
| III (a or b)           | 38                     |
| N/A                    | 6                      |
| <b>LDH (Ratio)</b>     |                        |
| Median                 | 0.94                   |
| (Interquartile range)  | (0.73,1.18)            |
| <b>Stage</b>           |                        |
| I / Ie                 | 17                     |
| II / IIe               | 29                     |
| III / IIIe             | 55                     |
| IV                     | 66                     |
| N/A                    | 2                      |
| <b>IPI</b>             |                        |
| Median                 | 1(1,2)                 |
| (Interquartile range)  |                        |
| Low (0-2)              | 136                    |
| High (3-5)             | 25                     |
| N/A                    | 8                      |
| <b>B-symptoms</b>      |                        |
| Absent                 | 135                    |
| Present                | 32                     |
| N/A                    | 2                      |
| <b>BM infiltration</b> |                        |
| Absent                 | 103                    |
| Present                | 66                     |
| <b>Transformation</b>  |                        |
| None                   | 102                    |
| Clinical               | 12                     |
| Pathological           | 27                     |
| N/A                    | 28                     |
