# Supplementary material
Source: PubMed Central journal article supplement (PMC2652373)
Supplement: blood-2008-08-174953_2.pdf [file blood-2008-08-174953_2.pdf]

| <b>Gene</b>               | <b>Chromosome</b> | <b>Sample type</b> | <b>No of cases</b> | <b>Result</b> | <b>Function</b>                                                  |
|---------------------------|-------------------|--------------------|--------------------|---------------|------------------------------------------------------------------|
| <i>ID4</i>                | 6p22.3            | UPD 6p             | 23/25              | Unmutated     | ID family; involved in cellular growth                           |
| <i>BRD2</i>               | 6p21.32           | UPD 6p             | 23/25              | Unmutated     | Increased activity in Acute Lymphoblastic leukaemia              |
| <i>HLA DQB1</i>           | 6p21.32           | UPD 6p             | 23/25              | Unmutated     | Mutated in Diffuse Large B cell lymphoma                         |
| <i>SOCS1</i>              | 16p13.13          | UPD 16p            | 22/22              | Unmutated     | Mutated in Hodgkin lymphoma                                      |
| <i>CDK4</i>               | 12q14.1           | UPD 12q            | 12/17              | Unmutated     | Involved in Mantle Cell Lymphoma                                 |
| <i>DYRK2</i>              | 12q15             | UPD 12q            | 12/17              | Unmutated     | Activator of <i>TP53</i>                                         |
| <i>PTEN</i>               | 10q23.31          | Abn 10q †          | 14/17              | Unmutated     | Tumour suppressor gene                                           |
| <i>NFKB2(exons 18-22)</i> | 10q24.32          | Abn 10q †          | 14/17              | Unmutated     | Structural alterations in B- and T- cell lymphomas <sup>24</sup> |

† Abn 10q includes cases with aUPD and loss of 10q
