# Supplementary material
Source: PubMed Central journal article supplement (PMC2652373)
Supplement: blood-2008-08-174953_3.pdf [file blood-2008-08-174953_3.pdf]

| <b>Patient</b> | <b>Start (base pairs)</b> | <b>End (base pairs)</b> | <b>Other abnormalities</b>                     |
|----------------|---------------------------|-------------------------|------------------------------------------------|
| 738            | 1                         | 36815936                | 1p aUPD                                        |
| 1075           | 1                         | 44403620                | 1p aUPD, 7q aUPD, 9q loss                      |
| 1099           | 1                         | 57545807                | 16p aUPD                                       |
| 1104           | 1                         | 36815936                | 12q aUPD                                       |
| 1184           | 1                         | 45343921                | None                                           |
| 1428           | 1                         | 44303923                | 10 aUPD, 6q loss                               |
| 1472           | 1                         | 44511922                | 2q aUPD                                        |
| 1479           | 1                         | 52831908                | 1p aUPD, 6q loss, 15 UPD                       |
| 1581           | 1                         | 40559929                | 5q loss, 10 aUPD, 13q aUPD, 14q loss, 17p aUPD |
| 1606           | 1                         | 44511922                | 1p aUPD                                        |
| 1608           | 1                         | 44511922                | None                                           |
| 1626           | 1                         | 36191937                | 13q aUPD, 6q aUPD                              |
| 1654           | 7071989                   | 29119950                | None                                           |
| 1720           | 1                         | 57407900                | 12 aUPD, 13 loss                               |
| 1729           | 1                         | 50959911                | 13q loss                                       |
| 1761           | 1                         | 34527940                | None                                           |
| 1825           | 1                         | 41391928                | 1p aUPD, 2q loss, 3p loss, 8p loss             |
| 1828           | 1                         | 44511922                | 12q aUPD                                       |
| 1844           | 1                         | 39519931                | None                                           |
| 1855           | 1                         | 36815936                | None                                           |
| 1880           | 1                         | 44303923                | 4p aUPD, 4q loss, 18 gain                      |
| 1882           | 1                         | 41391928                | 15q aUPD                                       |
| 1903           | 48047916                  | 64895886                | 9q aUPD, 18 aUPD                               |
| 1907           | 1                         | 34527940                | 1p aUPD, 3p aUPD, 14 loss                      |
| 1910           | 1                         | 44303923                | 7p aUPD, 18p aUPD                              |
