# Supplementary material
Source: PubMed Central journal article supplement (PMC2652373)
Supplement: blood-2008-08-174953_4.pdf [file blood-2008-08-174953_4.pdf]

| <b>Patient</b> | <b>Start (base pairs)</b> | <b>End (base pairs)</b> | <b>Other abnormalities</b>                  | <b>Patient Transformed</b> |
|----------------|---------------------------|-------------------------|---------------------------------------------|----------------------------|
| 735            | 1                         | 26367215                | None                                        | No                         |
| 1076           | 1                         | 49708683                | 2q aUPD                                     | Yes                        |
| 1088           | 1                         | 27339776                | None                                        | No                         |
| 1090           | 1                         | 48736122                | 12q aUPD                                    | No                         |
| 1099           | 1                         | 48736122                | 6p aUPD                                     | No                         |
| 1186           | 1                         | 49276433                | 13 aUPD                                     | Yes                        |
| 1426           | 1                         | 49324418                | 6q loss, 18 gain                            | No                         |
| 1476           | 1                         | 51267173                | None                                        | Yes                        |
| 1669           | 1                         | 26259152                | 1p aUPD, 10q loss                           | No                         |
| 1670           | 1                         | 20531848                | None                                        | No                         |
| 1675           | 1                         | 49276433                | None                                        | No                         |
| 1718           | 1                         | 49168371                | 6q loss                                     | Yes                        |
| 1732           | 6283919                   | 51598610                | 1q gain , 5 aUPD, 12q gain,15p aUPD         | Yes                        |
| 1735           | 1                         | 49648210                | 1p loss, 2p loss, 5 aUPD, 10q loss, 12 aUPD | Yes                        |
| 1764           | 1                         | 26259152                | 10q loss                                    | No                         |
| 1836           | 1                         | 51113493                | None                                        | No                         |
| 1853           | 1                         | 51113493                | None                                        | No                         |
| 1854           | 6159555                   | 48736122                | None                                        | Yes                        |
| 1862           | 1                         | 48736122                | None                                        | Yes                        |
| 1873           | 1                         | 50140932                | None                                        | Yes                        |
| 1904           | 1                         | 12535234                | 1p aUPD, 10q loss                           | No                         |
| 1916           | 1                         | 48736122                | 4 aUPD                                      | Yes                        |
